# Supplementary material for: Efficacy of medium chain triglyceride oil dietary supplementation in reducing seizure frequency in dogs with idiopathic epilepsy without cluster seizures: a non-blinded, prospective clinical trial
Source: PubMed Central journal article supplement — Vet Rec. 2020 Oct 29;187(9):356. doi: 10.1136/vr.105410 (PMC7799411; doi:10.1136/vr.105410), 2020-10-29
Supplement: vr.105410supp001.pdf [file vr.105410supp001.pdf]

Supplementary Figure 1. Visual Analogue Scale

**Owner’s evaluation of the dog’s quality of life**

How would you assess your dog’s quality of life? Please mark on the line below where 0 is normal and 100 is so bad that you believe euthanasia is justified.

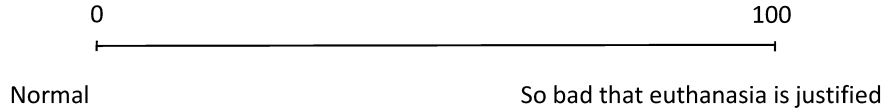

**Owner’s evaluation of the dog’s ataxia**

How would you assess your dog’s issues with walking? Please mark on the line below from 0 (none) to 100 (so severe that the dog is unable to walk).

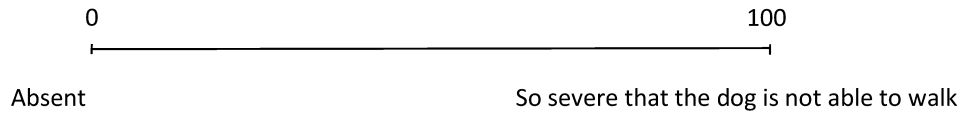

**Owner’s evaluation of the dog’s sedation**

How would you assess your dog’s “sleepiness”? Please mark on the line below from 0 (none) to 100 (the dog sleeps permanently).

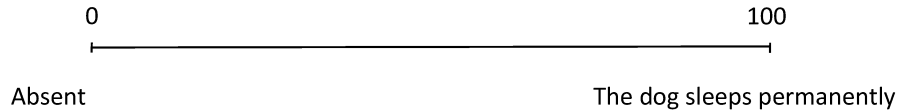

**Owner’s evaluation of the dog’s dietary intake**

How much of the special diet is your dog consuming? Please mark on the line below from 0 (eating refusal) to 100 (the dog eat the full ration).

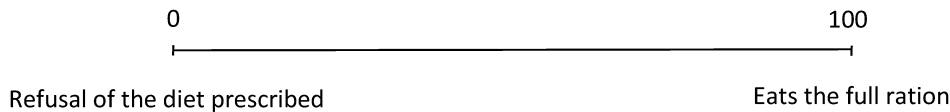

**Comments :**.....  
.....  
.....
